# Supplementary material
Source: publisher site journal article supplement (https://www.spandidos-publications.com/7519/downloadSupplementary)
Supplement: Supplementary file 1 [file downloadSupplementary]

## Sheet: Table SII
Table SII. Correlation analysis results of 501 gene sets scores with the α-ketoglutarate index.
Term	tar_name	cor_results	cor_pvalue
mRNAsi	AKGI	-0.433	1.87e-15
Base_excision_repair	AKGI	-0.371437	1.77e-11
Pyrimidine_Metabolism	AKGI	-0.344458	5.59e-10
Pyrimidine_Biosynthesis	AKGI	-0.323628	6.47e-09
Nucleotide_excision_repair	AKGI	-0.315546	1.59e-08
Hexosamine_Biosynthesis	AKGI	-0.267902	1.94e-06
Cell_cycle	AKGI	-0.282502	4.84e-07
DNA_replication	AKGI	-0.276993	8.21e-07
Terpenoid_Backbone_Biosynthesis	AKGI	-0.268458	1.82e-06
Glycosphosphatidylinositol	AKGI	-0.267254	2.03e-06
Mismatch_Repair	AKGI	-0.262484	3.13e-06
Ferroptosis	AKGI	-0.251369	4.32e-05
Th2_cells_xCell	AKGI	-0.2348	3.25e-05
Th2_cells_Bindea_et_al	AKGI	-0.230562	4.54e-05
Glyoxylate_and_Dicarboxylate_Metabolism	AKGI	-0.218114	0.000116892
Cholesterol_Biosynthesis	AKGI	-0.207563	0.000250323
Polyamine_Biosynthesis	AKGI	-0.206571	0.000268395
Urea_Cycle	AKGI	-0.205323	0.000292854
Sirtuin_Nicotinamide_Metabolism	AKGI	-0.201048	0.000393316
Purine_Biosynthesis	AKGI	-0.199325	0.000442207
Cardiolipin_Metabolism	AKGI	-0.196513	0.000534263
CLP_xCell	AKGI	-0.195248	0.000581199
Tgd_cells_xCell	AKGI	-0.187905	0.000938159
Extracellular_vesicle_biogenesis	AKGI	-0.184895	0.00113587
Osteoblast_xCell	AKGI	-0.18164	0.00139231
Sulfur_Metabolism	AKGI	-0.180635	0.00148166
Th1_cells_xCell	AKGI	-0.176017	0.0019636
Fructose_and_Mannose_Metabolism	AKGI	-0.175512	0.0020241
Exosomal_secretion	AKGI	-0.175474	0.00202878
IL4_score_21050467	AKGI	-0.166792	0.003378
Propanoate_Metabolism	AKGI	-0.163886	0.00398559
Butanoate_Metabolism	AKGI	-0.163839	0.00399626
Basophils_xCell	AKGI	-0.163051	0.00417774
MEP_xCell	AKGI	-0.160885	0.00471543
Other_quantiseq	AKGI	-0.159201	0.0051754
P.value_CIBERSORT	AKGI	-0.153508	0.00704539
Selenocompound_Metabolism	AKGI	-0.150892	0.0080915
Epithelial_cells_xCell	AKGI	-0.146913	0.00994817
Citric_Acid_Cycle	AKGI	-0.145245	0.0108329
RMSE_CIBERSORT	AKGI	-0.143474	0.011848
Oxidative_Phosphorylation	AKGI	-0.139029	0.0147732
Arginine_Biosynthesis	AKGI	-0.138125	0.0154396
Pyruvate_Metabolism	AKGI	-0.137785	0.0156971
Valine_Leucine_and_Isoleucine_Degradation	AKGI	-0.134966	0.0179819
Amino_Sugar_and_Nucleotide_Sugar_Metabolism	AKGI	-0.130149	0.0225604
Interferons_Li_et_al	AKGI	-0.127508	0.025474
Ubiquinone_and_other_Terpenoid_Quinone_Biosynthesis	AKGI	-0.127237	0.0257912
T_cells_CD4_memory_activated_CIBERSORT	AKGI	-0.125153	0.028341
Remethylation	AKGI	-0.124137	0.0296606
TMEscoreA_plus	AKGI	-0.119988	0.0356071
Nitrogen_Metabolism	AKGI	-0.118194	0.0384769
MCD3_CD8_21214954	AKGI	-0.116535	0.0413017
pro_B.cells_xCell	AKGI	-0.115252	0.0436042
Heme_Biosynthesis	AKGI	-0.112156	0.0496101
Fatty_Acid_Biosynthesis	AKGI	-0.10937	0.0555892
NK_cells_quantiseq	AKGI	-0.109164	0.056054
Bcell_receptors_score	AKGI	-0.108771	0.0569484
CD103pos_mean_25446897	AKGI	-0.1085	0.0575728
Ketone_Biosynthesis_and_Metabolism	AKGI	-0.105679	0.0644195
LIexpression_score	AKGI	-0.104067	0.068621
B_cell_PCA_16704732	AKGI	-0.103577	0.0699405
T_cells_follicular_helper_CIBERSORT	AKGI	-0.101626	0.0754094
IgG_19272155	AKGI	-0.100735	0.078019
KEGG_HEMATOPOIETIC_CELL_LINEAGE	AKGI	-0.0991248	0.082919
SW480_cancer_cells_Bindea_et_al	AKGI	-0.0968176	0.0903714
IGG_Cluster_21214954	AKGI	-0.0964596	0.0915745
Shingolipid_Metabolism	AKGI	-0.0934865	0.102067
Module4_TcellBcell_score	AKGI	-0.0901435	0.114978
Plasma_cells_xCell	AKGI	-0.0900426	0.115386
Troester_WoundSig_19887484	AKGI	-0.0899267	0.115857
T.cells.regulatory..Tregs.	AKGI	-0.0896866	0.116837
TMEscoreA_CIR	AKGI	-0.0885016	0.12177
CD8_Tcells_EPIC	AKGI	-0.0875699	0.125761
Macrophages_M1_quantiseq	AKGI	-0.0840459	0.14178
Alanine_Aspartate_and_Glutamate_Metabolism	AKGI	-0.0837263	0.143306
T.cells.CD4.naive	AKGI	-0.0829244	0.147191
LCK_19272155	AKGI	-0.0819174	0.152184
Macrophages_M0_CIBERSORT	AKGI	-0.0819084	0.152229
CD8._naive_T.cells_xCell	AKGI	-0.0813605	0.154999
HER2_Immune_PCA_18006808	AKGI	-0.0812331	0.155649
IFNG_score_21050467	AKGI	-0.0808491	0.157619
Bcell_21978456	AKGI	-0.0808274	0.157731
T_cell_PCA_16704732	AKGI	-0.0805928	0.158944
Tcell_receptors_score	AKGI	-0.0791594	0.166512
IFN_21978456	AKGI	-0.0777028	0.174475
Tcell_21978456	AKGI	-0.0770171	0.178321
CD103pos_CD103neg_ratio_25446897	AKGI	-0.0763452	0.182149
Methionine_Cycle	AKGI	-0.0763239	0.182271
Other_Glycan_Degradation	AKGI	-0.0748913	0.19064
NK_cells_activated_CIBERSORT	AKGI	-0.0744272	0.193411
Caffiene_Metabolism	AKGI	-0.0724813	0.205348
MHC_Class_I	AKGI	-0.0716269	0.210755
B.cells.naive	AKGI	-0.0712808	0.212974
STAT1_score	AKGI	-0.0711911	0.213551
CellCycle_Reg	AKGI	-0.0703586	0.218968
Module3_IFN_score	AKGI	-0.0700015	0.221321
IR7_score	AKGI	-0.069968	0.221543
Pentose_Phosphate	AKGI	-0.069679	0.223462
NK_cells_resting_CIBERSORT	AKGI	-0.0684712	0.231609
Module5_TcellBcell_score	AKGI	-0.0680286	0.234648
Interferon_19272155	AKGI	-0.0666911	0.243998
APM	AKGI	-0.0661601	0.247781
Minterferon_Cluster_21214954	AKGI	-0.0659003	0.249647
Interferon_Cluster_21214954	AKGI	-0.0641783	0.262261
Beta_Alanine_Metabolism	AKGI	-0.0641651	0.262359
GP11_Immune_IFN	AKGI	-0.0637877	0.265182
Molecular_Cancer_m6A	AKGI	-0.0629481	0.271537
IL2_score_21050467	AKGI	-0.0626868	0.273535
Keratinocytes_xCell	AKGI	-0.0621823	0.277422
Nicotinamide_Adenine_Metabolism	AKGI	-0.0621328	0.277806
Chemokine12_score	AKGI	-0.0611907	0.28517
IL12_score_21050467	AKGI	-0.0610387	0.286371
Nature_metabolism_Hypoxia	AKGI	-0.060947	0.287097
TGFB_score_21050467	AKGI	-0.0590197	0.30264
Steroid_Biosynthesis	AKGI	-0.0587669	0.304719
CTLA4_data	AKGI	-0.0579386	0.311598
CD103neg_mean_25446897	AKGI	-0.0576281	0.314202
MDACC.FNA.1_20805453	AKGI	-0.056819	0.321056
T.cells.CD4.memory.resting	AKGI	-0.0566908	0.322151
PD1_data	AKGI	-0.0563287	0.325256
Immune_cell_Cluster_21214954	AKGI	-0.0545877	0.340457
IL13_score_21050467	AKGI	-0.0544802	0.34141
Mast_cells_xCell	AKGI	-0.0534183	0.350917
Folate_One_Carbon_Metabolism	AKGI	-0.0532685	0.352271
Bcell_mg_IGJ	AKGI	-0.0529048	0.355574
CSF1_response	AKGI	-0.0522881	0.361217
PD1_PDL1_score	AKGI	-0.0521391	0.362589
CD4._memory_T.cells_xCell	AKGI	-0.0509234	0.373903
NHI_5gene_score	AKGI	-0.0505467	0.377452
Glycolysis	AKGI	-0.050469	0.378186
NK_cells_xCell	AKGI	-0.050166	0.38106
Dendritic.cells.resting	AKGI	-0.049503	0.387393
NK.cells.activated	AKGI	-0.0494868	0.387549
pDC_xCell	AKGI	-0.0477526	0.404418
Dendritic_cells_quantiseq	AKGI	-0.0462017	0.419869
N_Glycan_Biosynthesis	AKGI	-0.0458769	0.423148
Gluconeogenesis	AKGI	-0.0457754	0.424176
Linoleic_Acid_Metabolism	AKGI	-0.0454092	0.427897
MPP_xCell	AKGI	-0.0433633	0.449024
Neomycin_Kanamysin_and_Gentamicin_Biosynthesis	AKGI	-0.0433591	0.449068
Folate_biosynthesis	AKGI	-0.0419156	0.464324
CD68	AKGI	-0.0412186	0.471791
CD8_PCA_16704732	AKGI	-0.0394095	0.491478
CD8._Tem_xCell	AKGI	-0.0388099	0.498098
STAT1_19272155	AKGI	-0.0385627	0.500841
CD8A	AKGI	-0.0371896	0.516222
Starch_and_Suctose_Metabolism	AKGI	-0.0363447	0.525805
PDL1_data	AKGI	-0.0356797	0.533412
TcClassII_score	AKGI	-0.0331148	0.563258
Galactose_Metabolism	AKGI	-0.0328613	0.56625
Sebocytes_xCell	AKGI	-0.0322179	0.573881
ICS5_score	AKGI	-0.0320407	0.57599
Macrophages.M1	AKGI	-0.0314376	0.583197
TGFB_PCA_17349583	AKGI	-0.0295571	0.605936
mDNAsi	AKGI	-0.0281763	0.62288
B_cells_memory_CIBERSORT	AKGI	-0.025283	0.659026
Cysteine_and_Methionine_Metabolism	AKGI	-0.0233671	0.683413
Buck14_score	AKGI	-0.0225255	0.694232
Platelets_xCell	AKGI	-0.021493	0.70759
TIP_Infiltration_of_immune_cells_into_tumors_2	AKGI	-0.0211793	0.711666
MHC.II_19272155	AKGI	-0.0208208	0.716335
T_cells_CD8_CIBERSORT	AKGI	-0.0183175	0.749221
CMLS_Review_Exosome	AKGI	-0.0180799	0.752368
IFNG_signature_Ayers_et_al	AKGI	-0.0178706	0.755143
Lysine_Degradation	AKGI	-0.0169242	0.767729
DAP12_data	AKGI	-0.0161329	0.778299
Estradiol_Biosynthesis	AKGI	-0.0153391	0.788944
Mast_cells_activated_CIBERSORT	AKGI	-0.0152065	0.790727
CD8_c9_Tsen	AKGI	-0.0151747	0.791154
CD8_CD68_ratio	AKGI	-0.0131424	0.818602
T_helper_cells_Bindea_et_al	AKGI	-0.011773	0.837225
NK_CD56dim_cells_Bindea_et_al	AKGI	-0.0111457	0.845786
Monocytes	AKGI	-0.0106471	0.852605
TAMsurr_score	AKGI	-0.00764182	0.893916
CD_8_T_effector	AKGI	-0.0075753	0.894834
T.cells.follicular.helper	AKGI	-0.00595568	0.917227
MHC2_21978456	AKGI	-0.0049763	0.930801
alpha_Linoleic_Acid_Metabolism	AKGI	-0.00484244	0.932658
NK.cells.resting	AKGI	-0.00423901	0.941034
Macrophages_M1_CIBERSORT	AKGI	-0.00358843	0.950071
IL8_21978456	AKGI	-0.00126818	0.982344
Class.switched_memory_B.cells_xCell	AKGI	-0.000684295	0.990473
B.cells.memory	AKGI	-0.00067106	0.990657
AKGI, α-ketoglutarate index.
